# Supplementary material for: Engineered Cross-Linked Silane with Urea Polymer Thin Durable Coatings onto Polymeric Films for Controlled Antiviral Release of Activated Chlorine and Essential Oils
Source: MDPI journal article supplement (doi:10.3390/jfb14050270), 2023-05-12
Supplement: s1 [file s1]

## SUPPORTING INFORMATION

### Engineered Cross-Linked Silane with Urea Polymer Thin Durable Coating onto Polymeric Films for Controlled Antiviral Release of Activated Chlorine and Essential Oils

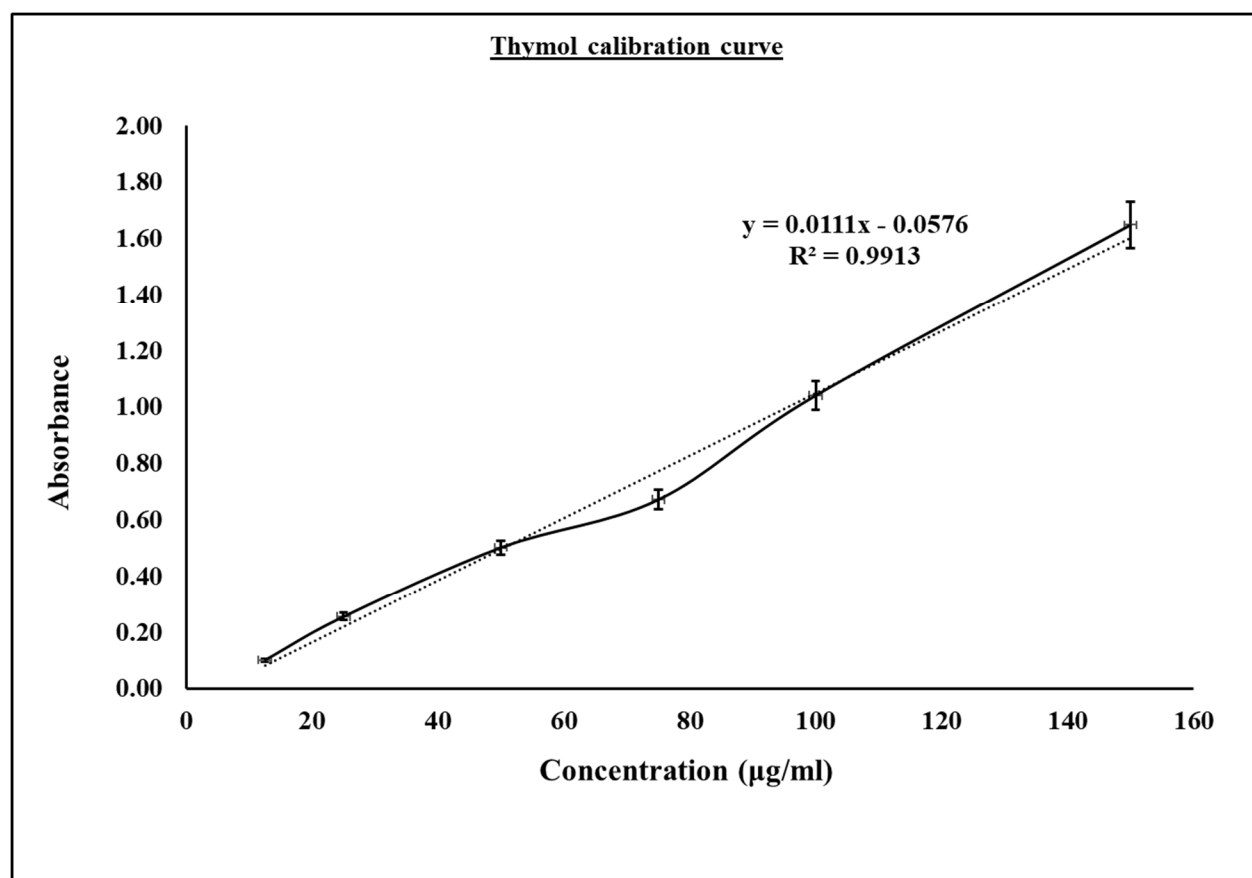

Figure S1: Thymol calibration curve.

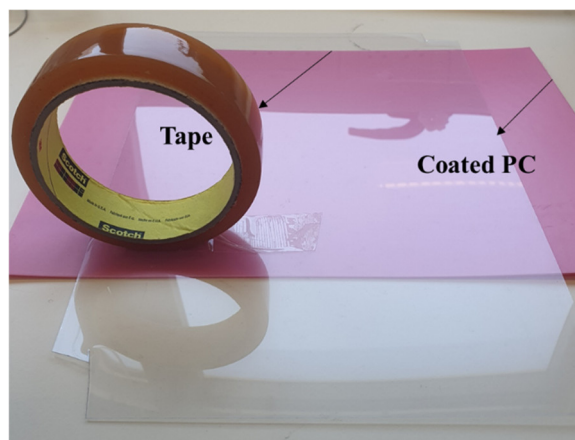

Figure S2: Adhesive test of coated film by tape. The tape was firmly pressed onto the PC/SiO<sub>2</sub>-urea film and slowly peeled off. After 25 repetitions, the ATR test was applied to the film.

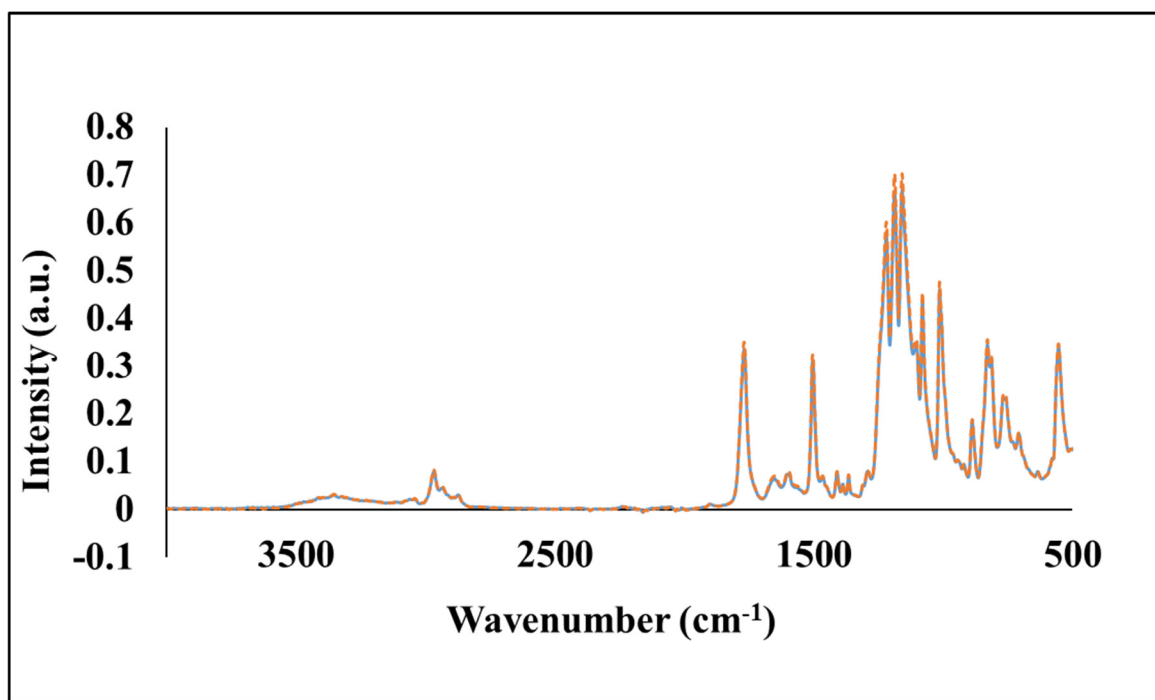

Figure S3: FTIR spectra of PC/SiO<sub>2</sub>-urea before (blue) and after (orange) tape test.

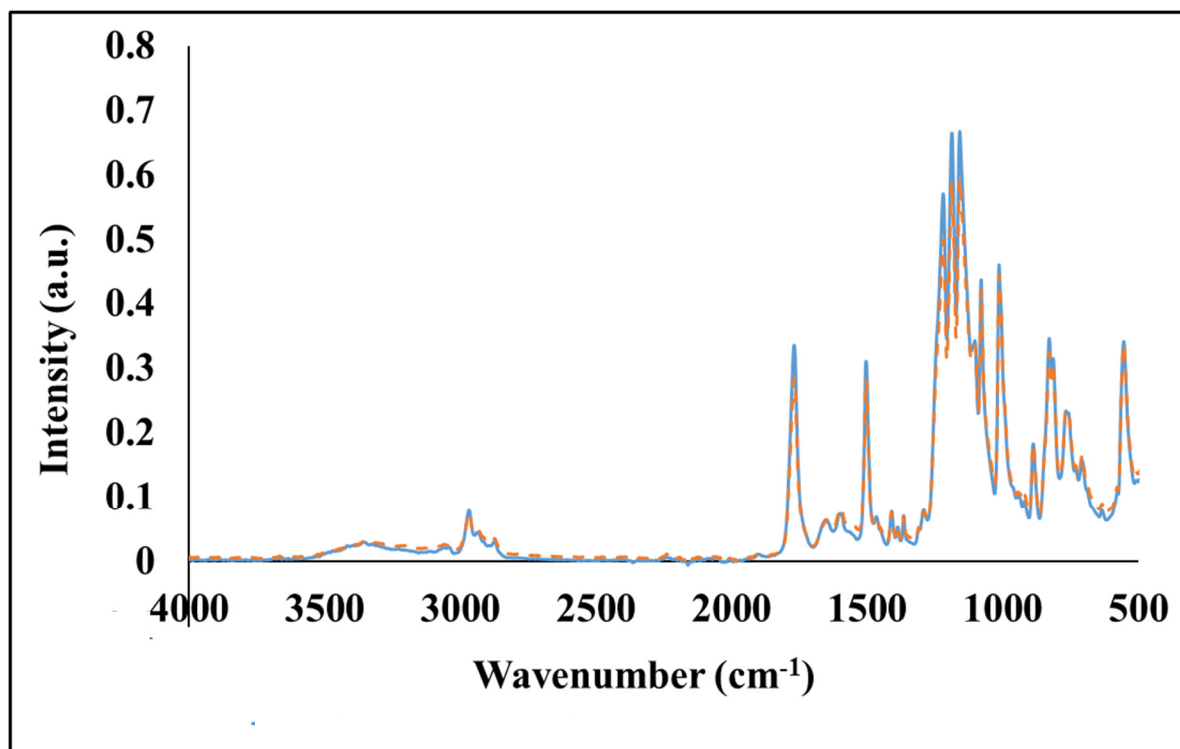

Figure S4: FTIR spectra of PC/SiO<sub>2</sub>-urea before (blue) and after (orange) 6-month soaking test in water.
